# Supplementary material for: Comparison of microbiota in the cloaca, colon, and magnum of layer chicken
Source: PLoS One. 2020 Aug 4;15(8):e0237108. doi: 10.1371/journal.pone.0237108 (PMC7402502; doi:10.1371/journal.pone.0237108)
Supplement: S1 Table — (XLSX) [file pone.0237108.s001.xlsx]

## Sheet: Percentile abundance
Percentile	0	50	100	0	50	100	0	50	100
Group	Cloaca	Cloaca	Cloaca	Colon	Colon	Colon	Magnum	Magnum	Magnum
Gallibacterium	1	5027	10469	1	1	1	1	1	17
Enterococcus	11	162	2628	1	1	421	1	8.5	31
unassigned Actinomycetales	229	1010	2589	1	1	1	91	517	1350
Janthinobacterium	1	604	1748	1	1	18	1	1	1
unassigned Gammaproteobacteria	31	881	1736	1	1	14	1	35.5	88
Actinomyces	23	141	1019	1	1	1	1	1	1
Helcococcus	1	57	1003	1	1	1	1	1	6
unassigned Pasteurellaceae	1	372	900	1	1	1	1	1	248
Acinetobacter	1	218	833	1	1	1	1	64	857
Stenotrophomonas	1	308	771	1	1	6	1	7.5	63
Morganella	1	76	295	1	1	1	1	1	1
Comamonas	1	70	180	1	1	1	1	1	11
unassigned Enterobacteriaceae	1	224	980	1	1	539	56	298.5	1081
unassigned Xanthomonadaceae	1	135	675	1	1	1	42	87.5	1270
Corynebacterium	1	91	202	1	1	1	1	102	534
Flavobacterium	1	61	1031	1	1	1	81	1559	15394
unassigned Rhodobacteraceae	1	1	1	1	1	1	1	75	1793
Brevundimonas	1	1	10	1	1	1	14	99.5	1024
unassigned Microbacteriaceae	1	1	1	1	1	7	29	196	975
unassigned Caulobacteraceae	1	1	35	1	1	1	35	299	908
unassigned Flavobacteriaceae	1	1	102	1	1	1	1	103	850
Propionibacterium	1	1	4	1	1	1	1	54.5	848
Methylobacterium	1	1	1	1	1	1	23	108.5	523
Rhodobacter	1	1	22	1	1	1	10	50.5	478
unassigned RF39	1	1	177	7	218	644	1	1	92
unassigned Coriobacteriaceae	1	1	90	31	85	310	1	4	54
unassigned Bacteroidales	1	1	1	4	43	102	1	1	1
